# Supplementary material for: E-Volve: understanding the impact of mutations in SARS-CoV-2 variants spike protein on antibodies and ACE2 affinity through patterns of chemical interactions at protein interfaces
Source: PeerJ journal article supplement (doi:10.7717/peerj.13099), 2022-03-22
Supplement: Supplementary_Material_V2.1.pdf [file Supplementary_Material_V2.1.pdf]

## Supplementary Material

### 1 Supplementary Figures and Tables

#### 1.1 Supplementary Figures

**Figure S1. Inter-chain interactions in spike protein for Delta (PDB ID 7V8B) and Omicron (PDB ID 7T9K) variants.**

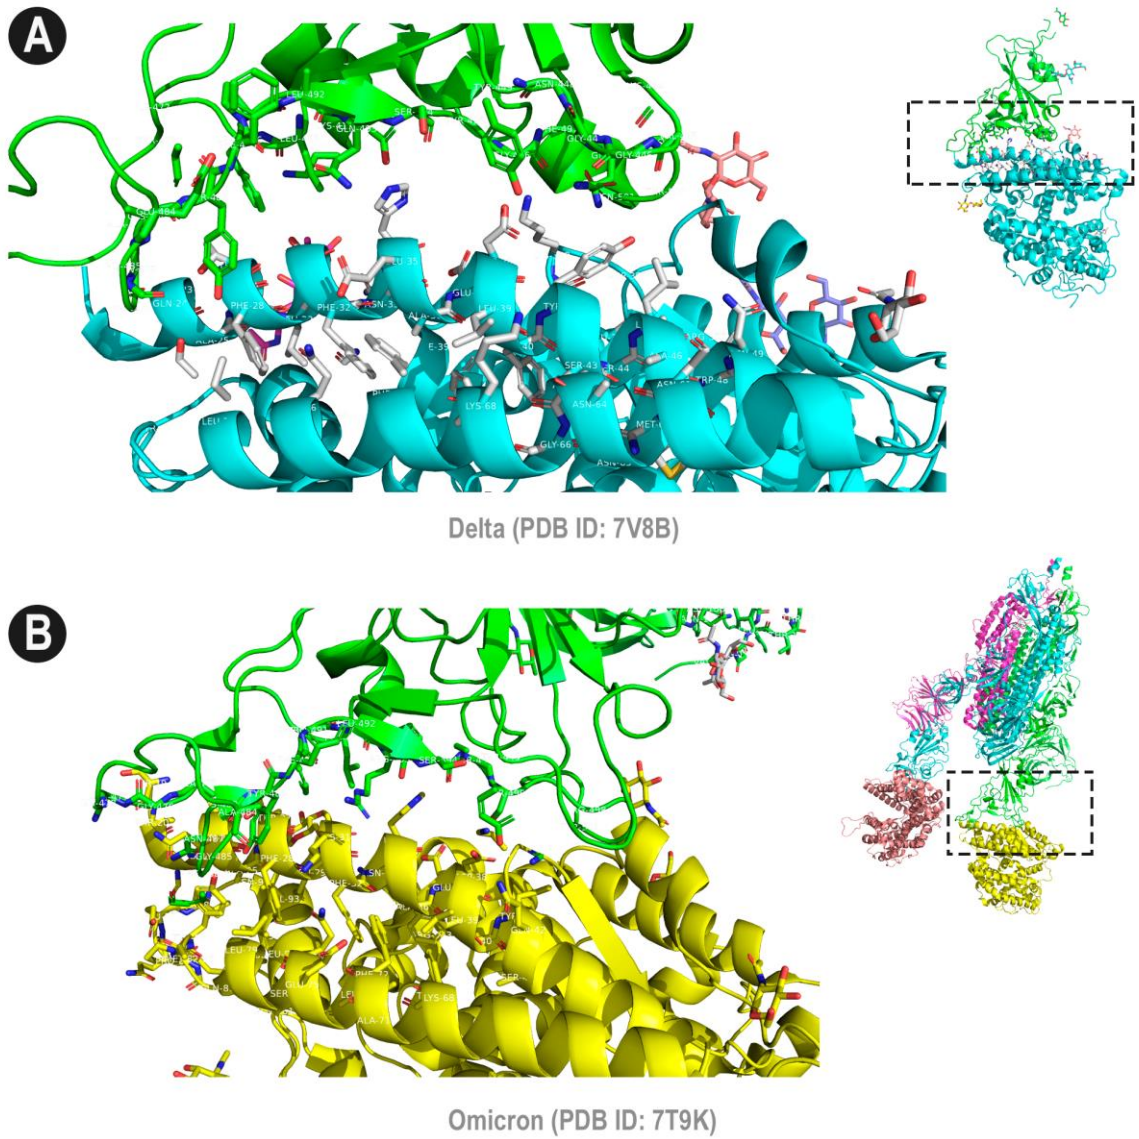

Figure S2. MD results for the RBD and RBM motifs.

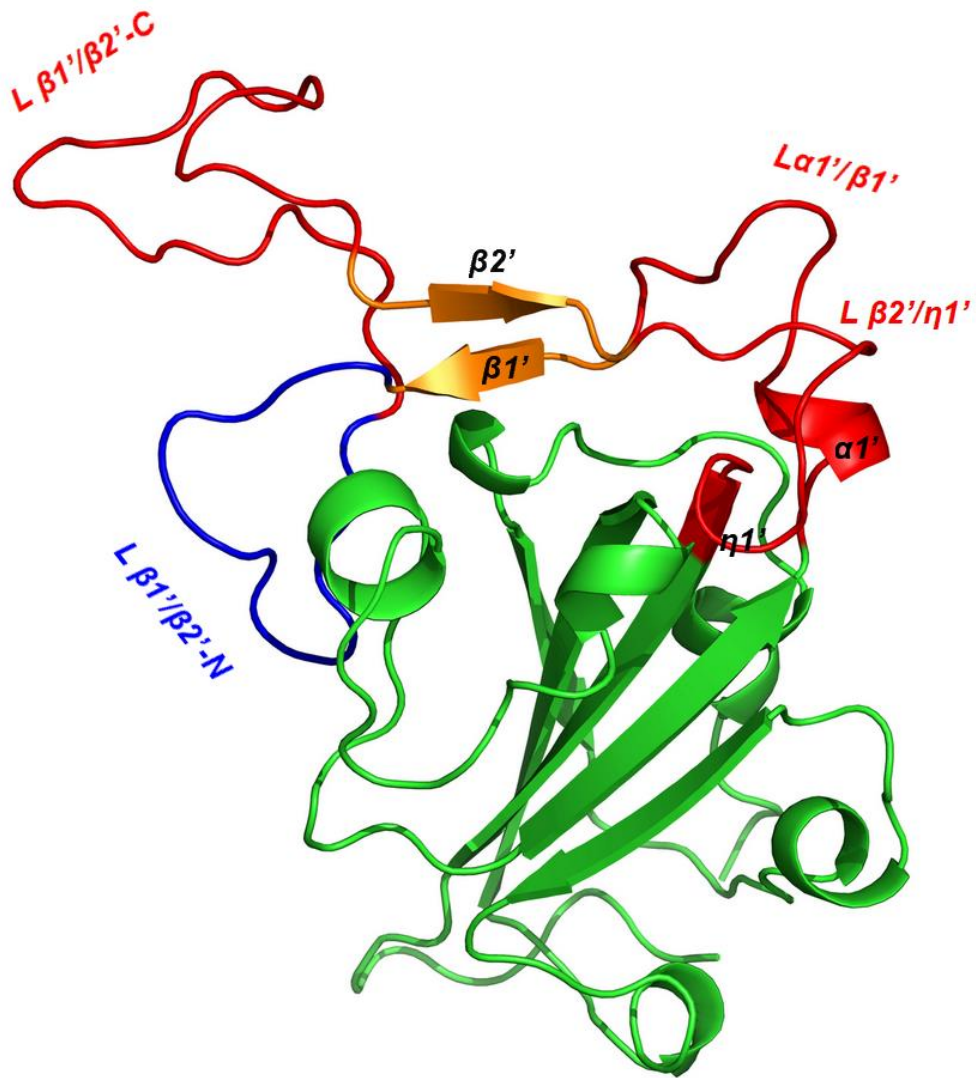

**Figure S3 - Influence of the differential context of the loop  $\alpha 1' / \beta 1'$  on the complementarity of the WT and P1 RBDs at the receptor and antibodies.**

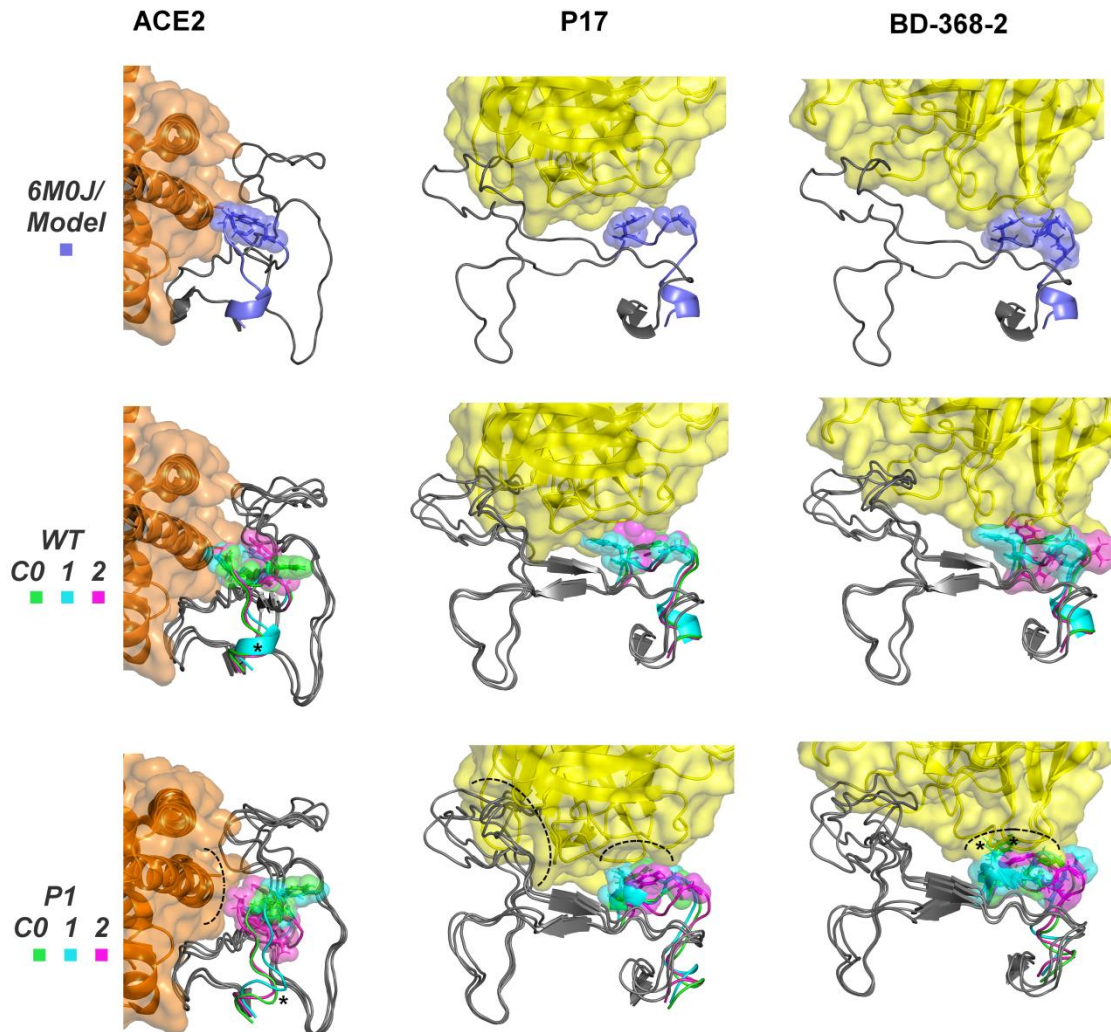

From the top to the bottom rows, the structure of the complex at the crystallographic structure (6M0J, being this also the same interface recovered for the P1 model using the MODELLER procedure), the superposition of the cluster centroids C0, C1 and C2 from the WT's MD simulations at each protein and the superposition of the respective cluster centroids from the P1's MDs are depicted. From the left to the right, the complexes with ACE2 (ACE2 structure from PDB:6M0J), P17 (antibody structure from PDB:7CWN) and BD-368-2 (antibody structure from PDB:7CHH) are shown. The residues from loop  $\alpha 1' / \beta 1'$  (438-450) are colored in purple (6M0J/Model interface), green (C0), cyan (C1) and magenta (C2). The key residues for interaction of this segment with the receptor and antibodies (G446, G447 and Y449) are shown in sticks and as transparent vdW spheres. The asterisks highlight special challenges to be overcome at the P1 loop  $\alpha 1' / \beta 1'$  binding: the higher disorder of the helix  $\alpha 1'$  carrying higher mobility; the steric hindrance between the Y449 and the BD-368-2 interface at the expanded loop on the C0 and C1 structures. The dashed arc in P1:ACE2 complex highlights the H1 helix protuberance over the core region of RBM; in P1:P17 depicts the major sites of contact with RBM, loops  $\beta 1' / \beta 2'$  (majorly) and  $\alpha 1' / \beta 1'$ ; in P1:BD-368-2 highlights the higher displacement of the binding interface for loop  $\alpha 1' / \beta 1'$ .

## Supplementary Material

### 1.2 Supplementary Tables

**Table S1.** List of 3D-structures (PDB IDs) collected from Protein Data Bank (<https://www.rcsb.org/>). Data was collected on April 30, 2021.

| <b>PDB ID</b> | <b>Description</b>                                                                                                     |
|---------------|------------------------------------------------------------------------------------------------------------------------|
| 6m0j          | Crystal structure of SARS-CoV-2 spike receptor-binding domain bound with ACE2                                          |
| 6w41          | Crystal structure of SARS-CoV-2 receptor binding domain in complex with human antibody CR3022                          |
| 6w7y          | Crystal structure of SARS-CoV and SARS-CoV-2 reactive human antibody CR3022                                            |
| 6xc2          | Crystal structure of SARS-CoV-2 receptor binding domain in complex with neutralizing antibody CC12.1                   |
| 6xc3          | Crystal structure of SARS-CoV-2 receptor binding domain in complex with antibodies CC12.1 and CR3022                   |
| 6xc4          | Crystal structure of SARS-CoV-2 receptor binding domain in complex with neutralizing antibody CC12.3                   |
| 6xc7          | Crystal structure of SARS-CoV-2 receptor binding domain in complex with antibodies CC12.3 and CR3022                   |
| 6xcm          | Structure of the SARS-CoV-2 spike glycoprotein in complex with the C105 neutralizing antibody Fab fragment (state 1)   |
| 6xcn          | Structure of the SARS-CoV-2 spike glycoprotein in complex with the C105 neutralizing antibody Fab fragment (state 2)   |
| 6xdg          | Complex of SARS-CoV-2 receptor binding domain with the Fab fragments of two neutralizing antibodies                    |
| 6xe1          | Structure of SARS-CoV-2 spike protein receptor binding domain in complex with a potent neutralizing antibody, CV30 Fab |
| 6xkp          | Crystal structure of SARS-CoV-2 receptor binding domain in complex with neutralizing antibody CV07-270                 |
| 6xkq          | Crystal structure of SARS-CoV-2 receptor binding domain in complex with neutralizing antibody CV07-250                 |

| <b>PDB ID</b> | <b>Description</b>                                                                                                                      |
|---------------|-----------------------------------------------------------------------------------------------------------------------------------------|
| 6zdg          | Association of three complexes of largely structurally disordered Spike ectodomain with bound EY6A Fab                                  |
| 6zdh          | SARS-CoV-2 Spike glycoprotein in complex with a neutralizing antibody EY6A Fab                                                          |
| 6zer          | Crystal structure of receptor binding domain of SARS-CoV-2 Spike glycoprotein in complex with EY6A Fab                                  |
| 6zfo          | Association of two complexes of largely structurally disordered Spike ectodomain with bound EY6A Fab                                    |
| 7a29          | Cryo-EM structure of the SARS-CoV-2 spike protein bound to neutralizing antibodies (Sb23) 2-up conformation                             |
| 7a5r          | Complex of SARS-CoV-2 spike and CR3022 Fab (Non-Uniform Refinement)                                                                     |
| 7a5s          | Complex of SARS-CoV-2 spike and CR3022 Fab (Homogeneous Refinement)                                                                     |
| 7b3o          | Crystal structure of the SARS-CoV-2 RBD in complex with STE90-C11 Fab                                                                   |
| 7beh          | Crystal structure of the receptor binding domain of SARS-CoV-2 Spike glycoprotein in complex with COVOX-316 Fab                         |
| 7bei          | Crystal structure of the receptor binding domain of SARS-CoV-2 Spike glycoprotein in complex with COVOX-150 Fab                         |
| 7bej          | Crystal structure of the receptor binding domain of SARS-CoV-2 Spike glycoprotein in complex with COVOX-158 Fab (crystal form 1)        |
| 7bek          | Crystal structure of the receptor binding domain of SARS-CoV-2 Spike glycoprotein in complex with COVOX-158 Fab (crystal form 2)        |
| 7bel          | Crystal structure of the receptor binding domain of SARS-CoV-2 Spike glycoprotein in a ternary complex with COVOX-88 and COVOX-45 Fabs  |
| 7bem          | Crystal structure of the receptor binding domain of SARS-CoV-2 Spike glycoprotein in complex with COVOX-269 scFv                        |
| 7ben          | Crystal structure of the receptor binding domain of SARS-CoV-2 Spike glycoprotein in a ternary complex with COVOX-253 and COVOX-75 Fabs |

Supplementary Material

| <b>PDB ID</b> | <b>Description</b>                                                                                                                          |
|---------------|---------------------------------------------------------------------------------------------------------------------------------------------|
| 7beo          | Crystal structure of the receptor binding domain of SARS-CoV-2 Spike glycoprotein in a ternary complex with COVOX-253H55L and COVOX-75 Fabs |
| 7bep          | Crystal structure of the receptor binding domain of SARS-CoV-2 Spike glycoprotein in a ternary complex with COVOX-384 and S309 Fabs         |
| 7bwj          | crystal structure of SARS-CoV-2 antibody with RBD                                                                                           |
| 7byr          | BD23-Fab in complex with the S ectodomain trimer                                                                                            |
| 7c01          | Molecular basis for a potent human neutralizing antibody targeting SARS-CoV-2 RBD                                                           |
| 7c2l          | S protein of SARS-CoV-2 in complex bound with 4A8                                                                                           |
| 7c8v          | Structure of sybody SR4 in complex with the SARS-CoV-2 S Receptor Binding domain (RBD)                                                      |
| 7c8w          | Structure of sybody MR17 in complex with the SARS-CoV-2 S receptor-binding domain (RBD)                                                     |
| 7cac          | SARS-CoV-2 S trimer with one RBD in the open state and complexed with one H014 Fab.                                                         |
| 7cah          | The interface of H014 Fab binds to SARS-CoV-2 S                                                                                             |
| 7cai          | SARS-CoV-2 S trimer with two RBDs in the open state and complexed with two H014 Fab                                                         |
| 7cak          | SARS-CoV-2 S trimer with three RBD in the open state and complexed with three H014 Fab                                                      |
| 7can          | Structure of sybody MR17-K99Y in complex with the SARS-CoV-2 S Receptor-binding domain (RBD)                                                |
| 7cdi          | Crystal structure of SARS-CoV-2 antibody P2C-1F11 with RBD                                                                                  |
| 7cdj          | Crystal structure of SARS-CoV-2 antibody P2C-1A3 with RBD                                                                                   |
| 7ch4          | Crystal structure of the SARS-CoV-2 S RBD in complex with BD-604 Fab                                                                        |

| <b>PDB ID</b> | <b>Description</b>                                                                                     |
|---------------|--------------------------------------------------------------------------------------------------------|
| 7ch5          | Crystal structure of the SARS-CoV-2 S RBD in complex with BD-629 Fab                                   |
| 7chb          | Crystal structure of the SARS-CoV-2 RBD in complex with BD-236 Fab                                     |
| 7chc          | Crystal structure of the SARS-CoV-2 S RBD in complex with BD-629 Fab and BD-368-2 Fab                  |
| 7che          | Crystal structure of the SARS-CoV-2 RBD in complex with BD-236 Fab and BD-368-2 Fab                    |
| 7chf          | Crystal structure of the SARS-CoV-2 RBD in complex with BD-604 Fab and BD-368-2 Fab                    |
| 7chh          | Cryo-EM structure of the SARS-CoV-2 S-6P in complex with BD-368-2 Fabs                                 |
| 7cjf          | Crystal structure of SARS-CoV-2 RBD in complex with a neutralizing antibody Fab                        |
| 7cr5          | Complex structure of a human monoclonal antibody with SARS-CoV-2 nucleocapsid protein NTD              |
| 7cwl          | SARS-CoV-2 spike protein and P17 fab complex with one RBD in close state                               |
| 7cwm          | Complex of SARS-CoV-2 spike protein and Fab P17 with one RBD in open state and two RBD in closed state |
| 7cwn          | P17-H014 Fab cocktail in complex with SARS-CoV-2 spike protein                                         |
| 7cwo          | SARS-CoV-2 spike protein RBD and P17 fab complex                                                       |
| 7cws          | SARS-CoV-2 Spike Proteins Trimer in Complex with FC05 and H014 Fabs Cocktail                           |
| 7cwu          | SARS-CoV-2 spike proteins trimer in complex with P17 and FC05 Fabs cocktail                            |
| 7czp          | S protein of SARS-CoV-2 in complex bound with P2B-1A1                                                  |
| 7czq          | S protein of SARS-CoV-2 in complex bound with P2B-1A10                                                 |

## Supplementary Material

| <b>PDB ID</b> | <b>Description</b>                                                                    |
|---------------|---------------------------------------------------------------------------------------|
| 7czt          | S protein of SARS-CoV-2 in complex bound with P5A-1B8_2B                              |
| 7czs          | S protein of SARS-CoV-2 in complex bound with P5A-1B8_3B                              |
| 7czt          | S protein of SARS-CoV-2 in complex bound with P5A-2G9                                 |
| 7czu          | S protein of SARS-CoV-2 in complex bound with P5A-1B6_2B                              |
| 7czv          | S protein of SARS-CoV-2 in complex bound with P5A-1B6_3B                              |
| 7czw          | S protein of SARS-CoV-2 in complex bound with P5A-2G7                                 |
| 7czx          | S protein of SARS-CoV-2 in complex bound with P5A-1B9                                 |
| 7czy          | S protein of SARS-CoV-2 in complex bound with P5A-2F11_2B                             |
| 7czz          | S protein of SARS-CoV-2 in complex bound with P5A-2F11_3B                             |
| 7d00          | S protein of SARS-CoV-2 in complex bound with FabP5A-1B8                              |
| 7d03          | S protein of SARS-CoV-2 in complex bound with FabP5A-2G7                              |
| 7d0b          | S protein of SARS-CoV-2 in complex bound with P5A-3C12_1B                             |
| 7d0c          | S protein of SARS-CoV-2 in complex bound with P5A-3A1                                 |
| 7d0d          | S protein of SARS-CoV-2 in complex bound with P5A-3C12_2B                             |
| 7d4g          | A proof of concept for neutralizing antibody-guided vaccine design against SARS-CoV-2 |
| 7deo          | Crystal structure of SARS-CoV-2 RBD in complex with a neutralizing antibody scFv      |
| 7dpm          | Crystal structure of SARS-CoV-2 Spike RBD in complex with MW06 Fab                    |



| <b>PDB ID</b> | <b>Description</b>                                                                                                                                      |
|---------------|---------------------------------------------------------------------------------------------------------------------------------------------------------|
| 7dx4          | The structure of FC08 Fab-hA.CE2-RBD complex                                                                                                            |
| 7.00E+23      | SARS-CoV-2 spike in complex with the CA521 neutralizing antibody Fab (focused refinement on Fab-RBD)                                                    |
| 7eam          | immune complex of SARS-CoV-2 RBD and cross-neutralizing antibody 7D6                                                                                    |
| 7jmo          | Crystal structure of SARS-CoV-2 receptor binding domain in complex with neutralizing antibody COVA2-04                                                  |
| 7jmp          | Crystal structure of SARS-CoV-2 receptor binding domain in complex with neutralizing antibody COVA2-39                                                  |
| 7jmw          | Crystal structure of SARS-CoV-2 spike protein receptor-binding domain in complex with cross-neutralizing antibody COVA1-16 Fab                          |
| 7jv2          | SARS-CoV-2 spike in complex with the S2H13 neutralizing antibody Fab fragment (local refinement of the receptor-binding motif and Fab variable domains) |
| 7jv4          | SARS-CoV-2 spike in complex with the S2H13 neutralizing antibody (one RBD open)                                                                         |
| 7jv6          | SARS-CoV-2 spike in complex with the S2H13 neutralizing antibody (closed conformation)                                                                  |
| 7jva          | SARS-CoV-2 spike in complex with the S2A4 neutralizing antibody Fab fragment (local refinement of the receptor-binding domain and Fab variable domains) |
| 7jvc          | SARS-CoV-2 spike in complex with the S2A4 neutralizing antibody Fab fragment                                                                            |
| 7jw0          | SARS-CoV-2 spike in complex with the S304 neutralizing antibody Fab fragment                                                                            |
| 7jwb          | SARS CoV2 Spike ectodomain with engineered trimerized VH binder                                                                                         |
| 7k43          | SARS-CoV-2 spike in complex with the S2M11 neutralizing antibody Fab fragment                                                                           |
| 7k45          | SARS-CoV-2 spike in complex with the S2E12 neutralizing antibody Fab fragment (local refinement of the RBD and Fab variable domains)                    |
| 7k4n          | SARS-CoV-2 spike in complex with the S2E12 neutralizing antibody Fab fragment                                                                           |

## Supplementary Material

| <b>PDB ID</b> | <b>Description</b>                                                                                                              |
|---------------|---------------------------------------------------------------------------------------------------------------------------------|
| 7k8m          | Structure of the SARS-CoV-2 receptor binding domain in complex with the human neutralizing antibody Fab fragment, C102          |
| 7k8s          | Structure of the SARS-CoV-2 S 2P trimer in complex with the human neutralizing antibody Fab fragment, C002 (state 1)            |
| 7k8t          | Structure of the SARS-CoV-2 S 6P trimer in complex with the human neutralizing antibody Fab fragment, C002 (State 2)            |
| 7k8u          | Structure of the SARS-CoV-2 S 6P trimer in complex with the human neutralizing antibody Fab fragment, C104                      |
| 7k8v          | Structure of the SARS-CoV-2 S 2P trimer in complex with the human neutralizing antibody Fab fragment, C110                      |
| 7k8w          | Structure of the SARS-CoV-2 S 2P trimer in complex with the human neutralizing antibody Fab fragment, C119                      |
| 7k8x          | Structure of the SARS-CoV-2 S 2P trimer in complex with the human neutralizing antibody Fab fragment, C121 (State 1)            |
| 7k8y          | Structure of the SARS-CoV-2 S 2P trimer in complex with the human neutralizing antibody Fab fragment, C121 (State 2)            |
| 7k8z          | Structure of the SARS-CoV-2 S 2P trimer in complex with the human neutralizing antibody Fab fragment, C135                      |
| 7k90          | Structure of the SARS-CoV-2 S 6P trimer in complex with the human neutralizing antibody Fab fragment, C144                      |
| 7k9z          | Crystal structure of SARS-CoV-2 receptor binding domain in complex with the Fab fragments of neutralizing antibodies 298 and 52 |
| 7kfv          | Structural basis for a germline-biased antibody response to SARS-CoV-2 (RBD:C1A-B12 Fab)                                        |
| 7kfw          | Structural basis for a germline-biased antibody response to SARS-CoV-2 (RBD:C1A-B3 Fab)                                         |
| 7kfx          | Structural basis for a germline-biased antibody response to SARS-CoV-2 (RBD:C1A-C2 Fab)                                         |

| <b>PDB ID</b> | <b>Description</b>                                                                                            |
|---------------|---------------------------------------------------------------------------------------------------------------|
| 7kfy          | Structural basis for a germline-biased antibody response to SARS-CoV-2 (RBD:C1A-F10 Fab)                      |
| 7kkl          | SARS-CoV-2 Spike in complex with neutralizing nanobody mNb6                                                   |
| 7klg          | SARS-CoV-2 RBD in complex with Fab 15033                                                                      |
| 7klh          | SARS-CoV-2 RBD in complex with Fab 15033-7                                                                    |
| 7kmg          | LY-CoV555 neutralizing antibody against SARS-CoV-2                                                            |
| 7kmh          | LY-CoV488 neutralizing antibody against SARS-CoV-2                                                            |
| 7kmi          | LY-CoV481 neutralizing antibody against SARS-CoV-2                                                            |
| 7kmk          | cryo-EM structure of SARS-CoV-2 spike in complex with Fab 15033-7, two RBDs bound                             |
| 7kml          | cryo-EM structure of SARS-CoV-2 spike in complex with Fab 15033-7, three RBDs bound                           |
| 7kn5          | Crystal structure of SARS-CoV-2 receptor binding domain complexed with nanobodies VHH E and U                 |
| 7kn6          | Crystal structure of SARS-CoV-2 receptor binding domain complexed with nanobody VHH V and antibody Fab CC12.3 |
| 7kn7          | Crystal structure of SARS-CoV-2 receptor binding domain complexed with nanobody VHH W and antibody Fab CC12.3 |
| 7ks9          | Cryo-EM structure of prefusion SARS-CoV-2 spike glycoprotein in complex with 910-30 Fab                       |
| 7kxj          | SARS-CoV-2 spike protein in complex with Fab 15033-7, 3-"up", asymmetric                                      |
| 7kxk          | SARS-CoV-2 spike protein in complex with Fab 15033-7, 2-"up"-1-"down" conformation                            |
| 7kzb          | Potent SARS-CoV-2 binding and neutralization through maturation of iconic SARS-CoV-1 antibodies               |

Supplementary Material

| PDB ID | Description                                                                                                              |
|--------|--------------------------------------------------------------------------------------------------------------------------|
| 7102   | Cryo-EM structure of SARS-CoV-2 2P S ectodomain bound to one copy of domain-swapped antibody 2G12                        |
| 7106   | Cryo-EM structure of SARS-CoV-2 2P S ectodomain bound to two copies of domain-swapped antibody 2G12                      |
| 7109   | Cryo-EM structure of SARS-CoV-2 2P S ectodomain bound domain-swapped antibody 2G12 from masked 3D refinement             |
| 710n   | Circulating SARS-CoV-2 spike N439K variants maintain fitness while evading antibody-mediated immunity                    |
| 712c   | Crystallographic structure of neutralizing antibody 2-51 in complex with SARS-CoV-2 spike N-terminal domain (NTD)        |
| 712d   | Cryo-EM structure of NTD-directed neutralizing antibody 1-87 in complex with prefusion SARS-CoV-2 spike glycoprotein     |
| 712e   | Cryo-EM structure of NTD-directed neutralizing antibody 4-18 in complex with prefusion SARS-CoV-2 spike glycoprotein     |
| 712f   | Cryo-EM structure of NTD-directed neutralizing antibody 5-24 in complex with prefusion SARS-CoV-2 spike glycoprotein     |
| 713n   | SARS-CoV 2 Spike Protein bound to LY-CoV555                                                                              |
| 7156   | Cryo-EM structure of the SARS-CoV-2 spike glycoprotein bound to Fab 2-43                                                 |
| 7157   | Cryo-EM structure of the SARS-CoV-2 spike glycoprotein bound to Fab 2-15                                                 |
| 7158   | Cryo-EM structure of the SARS-CoV-2 spike glycoprotein bound to Fab H4                                                   |
| 715b   | Crystallographic structure of neutralizing antibody 2-15 in complex with SARS-CoV-2 spike receptor-binding Domain (RBD). |
| 71aa   | Structure of SARS-CoV-2 S protein in complex with Receptor Binding Domain antibody DH1041                                |
| 71ab   | Structure of SARS-CoV-2 S protein in complex with N-terminal domain antibody DH1052                                      |

| <b>PDB ID</b> | <b>Description</b>                                                                                                                                                                 |
|---------------|------------------------------------------------------------------------------------------------------------------------------------------------------------------------------------|
| 7lcn          | Structure of SARS-CoV-2 S protein in complex with N-terminal domain antibody DH1050.1                                                                                              |
| 7ld1          | Structure of SARS-CoV-2 S protein in complex with Receptor Binding Domain antibody DH1047                                                                                          |
| 7lfz          | Human leukocyte antigen B*07:02 in complex with SARS-CoV2 epitope IPRRNVATL                                                                                                        |
| 7lg0          | Human leukocyte antigen B*07:02 in complex with SARS-CoV2 epitope SPRWYFYLL                                                                                                        |
| 7lg2          | Human leukocyte antigen A*0201 in complex with SARS-CoV2 epitope ALWEIQQVV                                                                                                         |
| 7lg3          | Human leukocyte antigen A*0201 in complex with SARS-CoV2 epitope KLWAQCVQL                                                                                                         |
| 7ljr          | SARS-CoV-2 Spike Protein Trimer bound to DH1043 fab                                                                                                                                |
| 7llf          | SARS-CoV-2 papain-like protease (PLpro) bound to inhibitor XR8-83                                                                                                                  |
| 7lm8          | Crystal structure of SARS-CoV-2 spike protein receptor-binding domain in complex with two cross-neutralizing antibodies CV38-142 and COVA1-16 Fabs isolated from COVID-19 patients |
| 7lop          | Crystal structure of SARS-CoV-2 receptor binding domain in complex with antibodies CV05-163 and CR3022                                                                             |
| 7lqv          | Cryo-EM structure of NTD-directed neutralizing antibody 4-8 Fab in complex with SARS-CoV-2 S2P spike                                                                               |
| 7lqw          | Cryo-EM structure of NTD-directed neutralizing antibody 2-17 Fab in complex with SARS-CoV-2 S2P spike                                                                              |
| 7ls9          | Cryo-EM structure of neutralizing antibody 1-57 in complex with prefusion SARS-CoV-2 spike glycoprotein                                                                            |
| 7lss          | Cryo-EM structure of the SARS-CoV-2 spike glycoprotein bound to Fab 2-7                                                                                                            |
| 7lxw          | SARS-CoV-2 S/S2M11/S2X333 Local Refinement                                                                                                                                         |

## Supplementary Material

| <b>PDB ID</b> | <b>Description</b>                                                                                                |
|---------------|-------------------------------------------------------------------------------------------------------------------|
| 7lxx          | SARS-CoV-2 S/S2M11/S2L28 Local Refinement                                                                         |
| 7lxy          | SARS-CoV-2 S/S2M11/S2X333 Global Refinement                                                                       |
| 7lxz          | SARS-CoV-2 S/S2M11/S2L28 Global Refinement                                                                        |
| 7ly0          | SARS-CoV-2 S/S2M11/S2M28 Local Refinement                                                                         |
| 7ly2          | SARS-CoV-2 S/S2M11/S2M28 Global Refinement                                                                        |
| 7ly3          | Crystal structure of SARS-CoV-2 S NTD bound to S2M28 Fab                                                          |
| 7m3i          | Structure of SARS-CoV-2 spike protein receptor binding domain in complex with a neutralizing antibody, CV2-75 Fab |
| 7m6d          | Structure of the SARS-CoV-2 RBD in complex with neutralizing antibodies BG4-25 and CR3022                         |
| 7m6e          | Structure of the SARS-CoV-2 S 6P trimer in complex with the human neutralizing antibody Fab fragment, BG10-19     |
| 7m6f          | Structure of the SARS-CoV-2 S 6P trimer in complex with the human neutralizing antibody Fab fragment, BG1-22      |
| 7m6g          | Structure of the SARS-CoV-2 S 6P trimer in complex with the human neutralizing antibody Fab fragment, BG7-15      |
| 7m6h          | Structure of the SARS-CoV-2 S 2P trimer in complex with the human neutralizing antibody Fab fragment, BG7-20      |
| 7m6i          | Structure of the SARS-CoV-2 S 2P trimer in complex with the human neutralizing antibody Fab fragment, BG1-24      |
| 7m7w          | Antibodies to the SARS-CoV-2 receptor-binding domain that maximize breadth and resistance to viral escape         |
| 7mf1          | Crystal structure of SARS-CoV-2 receptor binding domain in complex with neutralizing antibody 47D1                |

| <b>PDB ID</b> | <b>Description</b>                                                                                                           |
|---------------|------------------------------------------------------------------------------------------------------------------------------|
| 7mmo          | LY-CoV1404 neutralizing antibody against SARS-CoV-2                                                                          |
| 7nd3          | EM structure of SARS-CoV-2 Spike glycoprotein in complex with COVOX-40 Fab                                                   |
| 7nd4          | EM structure of SARS-CoV-2 Spike glycoprotein in complex with COVOX-88 Fab                                                   |
| 7nd5          | EM structure of SARS-CoV-2 Spike glycoprotein in complex with COVOX-150 Fab                                                  |
| 7nd6          | EM structure of SARS-CoV-2 Spike glycoprotein in complex with COVOX-40 Fab                                                   |
| 7nd7          | EM structure of SARS-CoV-2 Spike glycoprotein in complex with COVOX-316 Fab                                                  |
| 7nd8          | EM structure of SARS-CoV-2 Spike glycoprotein in complex with COVOX-384 Fab                                                  |
| 7nd9          | EM structure of SARS-CoV-2 Spike glycoprotein (one RBD up) in complex with COVOX-253H55L Fab                                 |
| 7nda          | EM structure of SARS-CoV-2 Spike glycoprotein (all RBD down) in complex with COVOX-253H55L Fab                               |
| 7ndb          | EM structure of SARS-CoV-2 Spike glycoprotein in complex with COVOX-253H165L Fab                                             |
| 7ndc          | EM structure of SARS-CoV-2 Spike glycoprotein (all RBD down) in complex with COVOX-159                                       |
| 7ndd          | EM structure of SARS-CoV-2 Spike glycoprotein (one RBD up) in complex with COVOX-159                                         |
| 7neg          | Crystal structure of the N501Y mutant receptor binding domain of SARS-CoV-2 Spike glycoprotein in complex with COVOX-269 Fab |
| 7neh          | Crystal structure of the receptor binding domain of SARS-CoV-2 Spike glycoprotein in complex with COVOX-269 Fab              |
| 7ntc          | Trimeric SARS-CoV-2 spike ectodomain bound to P008_056 Fab                                                                   |
| 7nx6          | Crystal structure of the receptor binding domain of SARS-CoV-2 Spike glycoprotein in complex with COVOX-222 and EY6A Fabs    |

## Supplementary Material

| <b>PDB ID</b> | <b>Description</b>                                                                                                                        |
|---------------|-------------------------------------------------------------------------------------------------------------------------------------------|
| 7nx7          | Crystal structure of the K417N mutant receptor binding domain of SARS-CoV-2 Spike glycoprotein in complex with COVOX-222 and EY6A Fabs    |
| 7nx8          | Crystal structure of the K417T mutant receptor binding domain of SARS-CoV-2 Spike glycoprotein in complex with COVOX-222 and EY6A Fabs    |
| 7nx9          | Crystal structure of the N501Y mutant receptor binding domain of SARS-CoV-2 Spike glycoprotein in complex with COVOX-222 and EY6A Fabs    |
| 7nxa          | Crystal structure of the receptor binding domain of SARS-CoV-2 B.1.351 variant Spike glycoprotein in complex with COVOX-222 and EY6A Fabs |
| 7nxb          | Crystal structure of the receptor binding domain of SARS-CoV-2 P.1 variant Spike glycoprotein in complex with COVOX-222 and EY6A Fabs     |



**Table S2.** RMSD concerning the starting structure, packing and mobility parameters recovered at the respective MD simulations for the WT and P1 RBD.

| <i>Protein-Cluster</i>                      | %    | <i>RBD-RMSD<sup>1*</sup></i><br>(Å) | <i>RBM-RMSD<sup>2*</sup></i><br>(Å) | <i>Av. Non-polar Packing for Carbons in residue 417<sup>3*</sup></i> | <i>Loop <math>\beta 1' / \beta 2' - C</math> RMSD (Å)<sup>4*</sup></i> | <i>B1'-<math>\beta 2'</math> Sheet RMSD (Å)<sup>4*</sup></i> | <i>Loop B2'/<math>\eta 1'</math> RMSD (Å)<sup>4*</sup></i> | <i>Loop <math>\alpha 1' / \beta 1'</math> RMSD (Å)<sup>4*</sup></i> | <i>RBM "Claw" Rav (Å)<sup>5*</sup></i> |
|---------------------------------------------|------|-------------------------------------|-------------------------------------|----------------------------------------------------------------------|------------------------------------------------------------------------|--------------------------------------------------------------|------------------------------------------------------------|---------------------------------------------------------------------|----------------------------------------|
| <b>WT-C0</b>                                | 89.6 | 1.306                               | 0.716                               | 1.5                                                                  | 1.699                                                                  | 1.471                                                        | 1.878                                                      | 1.677                                                               | 25.96                                  |
| <b>WT-C1</b>                                | 8.4  | 1.359                               | 1.696                               | 0.5                                                                  | 2.287                                                                  | 1.743                                                        | 2.512                                                      | 1.812                                                               | 26.56                                  |
| <b>WT-C2</b>                                | 1.9  | 1.797                               | 1.101                               | 1.5                                                                  | 1.890                                                                  | 1.567                                                        | 2.104                                                      | 1.764                                                               | 25.96                                  |
| <i>WT-weight-Av.<sup>6*</sup></i>           | -    | 1.319                               | 0.806                               | 1.4                                                                  | 1.752                                                                  | 1.495                                                        | 1.935                                                      | 1.691                                                               | 26.01                                  |
| <i>WT-weighted fluctuation<sup>7*</sup></i> | -    | $8.34 \cdot 10^{-2}$                | $33.7 \cdot 10^{-2}$                | $34.0 \cdot 10^{-2}$                                                 | $20.1 \cdot 10^{-2}$                                                   | $9.32 \cdot 10^{-2}$                                         | $21.7 \cdot 10^{-2}$                                       | $4.75 \cdot 10^{-2}$                                                | $20.4 \cdot 10^{-2}$                   |
| <b>P1-C0</b>                                | 98.1 | 1.196                               | 1.021                               | 2.0                                                                  | 1.791                                                                  | 1.476                                                        | 2.103                                                      | 2.603                                                               | 26.12                                  |
| <b>P1-C1</b>                                | 1.5  | 1.111                               | 1.397                               | 1.0                                                                  | 2.742                                                                  | 2.419                                                        | 2.274                                                      | 2.760                                                               | 26.72                                  |
| <b>P1-C2</b>                                | 0.3  | 1.074                               | 0.989                               | 0.5                                                                  | 2.818                                                                  | 2.097                                                        | 1.885                                                      | 2.162                                                               | 26.34                                  |
| <i>P1-weight-Av.<sup>6*</sup></i>           | -    | 1.194                               | 1.027                               | 2.0                                                                  | 1.836                                                                  | 1.491                                                        | 2.105                                                      | 2.604                                                               | 26.13                                  |
| <i>P1-weighted fluctuation<sup>7*</sup></i> | -    | $1.50 \cdot 10^{-2}$                | $5.61 \cdot 10^{-2}$                | $18.1 \cdot 10^{-2}$                                                 | $16.1 \cdot 10^{-2}$                                                   | $14.6 \cdot 10^{-2}$                                         | $2.94 \cdot 10^{-2}$                                       | $3.78 \cdot 10^{-2}$                                                | $9.05 \cdot 10^{-2}$                   |

## Supplementary Material

1\* – RMSD considering the  $C\alpha$  atoms of the entire RBD from the cluster centroid structure related to the crystal (6M0J) or model (MODELLER) structure firstly taken to E-Volve Analysis.

2\*- RMSD considering the  $C\alpha$  atoms of the entire RBM from the cluster centroid structure related to the crystal (6M0J) or model (MODELLER) structure firstly taken to E-Volve Analysis.

3\* – Average non-polar packing calculated from the number of non-hydrogen atoms from hydrophobic residue side chains (Ala, Leu, Val, Ile, Pro, Phe, Met, Trp) around 4 Å from the also hydrophobic atoms (carbons and non-polar hydrogens) at the side chain from the residue at position 417 (Lys for WT; Thr for P1), divided by the number of carbons at this same side chain (respectively 4 for the Lys and 2 for the Thr).

4\*- RMSD considering the  $C\alpha$  atoms from the RBM major elements involved in interactions with the receptor and/or antibodies. The C-terminal extension from Loop  $\beta 1'/\beta 2'$  (Loop  $\beta 1'/\beta 2'$ -C) – residues 470-490;  $\beta 1'$ - $\beta 2'$  sheet – residues 451-455 ( $\beta 1'$ ) and residues 492-496 ( $\beta 2'$ ); Loop  $\beta 2'/\eta 1'$  – residues 497-506; Loop  $\alpha 1'/\beta 1'$  – residues 438-450. The alignment was carried out in relation to the RBM region.

5\*- Average distance between the  $C\alpha$  atoms from the residues at the center of the three major loops defining the “claw” with high affinity to the receptor and to antibodies: Loop  $\beta 1'/\beta 2'$  (residue 480); Loop  $\beta 2'/\eta 1'$  (geometrical center from residues 501 and 502); Loop  $\alpha 1'/\beta 1'$  (residue 444).

6\*- Weighted average of the measures considering the respective percentage of each cluster as the weights.

7\*- Fluctuation calculated as the weighted standard deviation considering the respective percentages of each cluster as the weights and using the formula in Methods section. This estimation only considers the inter-cluster fluctuation of each measurement and not the internal fluctuations on each cluster (for the position related global fluctuations, the RMSF at Figure 5 A-B provides more accurate estimations).
